# Supplementary material
Source: ML conference proceedings conference paper supplement (https://openaccess.thecvf.com/content/CVPR2021/html/Liu_PointGuard_Provably_Robust_CVPR_2021_paper.html)
Supplement: Supplementary file 1 [file Liu_PointGuard_Provably_Robust_CVPR_2021_supplemental.pdf]

## A. Proof of Theorem 1

Given a point cloud  $T$  and its perturbed version  $T^*$ , we define the following two random variables:

$$\mathbf{W} = S_k(T), \mathbf{Z} = S_k(T^*), \quad (13)$$

where  $\mathbf{W}$  and  $\mathbf{Z}$  represent the random 3D point clouds with  $k$  points subsampled from  $T$  and  $T^*$  uniformly at random without replacement, respectively. We use  $\Phi$  to denote the joint space of  $\mathbf{W}$  and  $\mathbf{Z}$ , where each element is a 3D point cloud with  $k$  points subsampled from  $T$  or  $T^*$ . We denote by  $E$  the set of intersection points between  $T$  and  $T^*$ , i.e.,  $E = T \cap T^*$ .

Before proving our theorem, we first describe a variant of the Neyman-Pearson Lemma [21] that will be used in our proof. The variant is from [9].

**Lemma 1** (Neyman-Pearson Lemma). *Suppose  $\mathbf{W}$  and  $\mathbf{Z}$  are two random variables in the space  $\Phi$  with probability distributions  $\sigma_w$  and  $\sigma_z$ , respectively. Let  $H : \Phi \rightarrow \{0, 1\}$  be a random or deterministic function. Then, we have the following:*

- If  $Q_1 = \{\varphi \in \Phi : \sigma_w(\varphi) > \zeta \cdot \sigma_z(\varphi)\}$  and  $Q_2 = \{\varphi \in \Phi : \sigma_w(\varphi) = \zeta \cdot \sigma_z(\varphi)\}$  for some  $\zeta > 0$ . Let  $Q = Q_1 \cup Q_3$ , where  $Q_3 \subseteq Q_2$ . If we have  $\Pr(H(\mathbf{W}) = 1) \geq \Pr(\mathbf{W} \in Q)$ , then  $\Pr(H(\mathbf{Z}) = 1) \geq \Pr(\mathbf{Z} \in Q)$ .
- If  $Q_1 = \{\varphi \in \Phi : \sigma_w(\varphi) < \zeta \cdot \sigma_z(\varphi)\}$  and  $Q_2 = \{\varphi \in \Phi : \sigma_w(\varphi) = \zeta \cdot \sigma_z(\varphi)\}$  for some  $\zeta > 0$ . Let  $Q = Q_1 \cup Q_3$ , where  $Q_3 \subseteq Q_2$ . If we have  $\Pr(H(\mathbf{W}) = 1) \leq \Pr(\mathbf{W} \in Q)$ , then  $\Pr(H(\mathbf{Z}) = 1) \leq \Pr(\mathbf{Z} \in Q)$ .

*Proof.* Please refer to [9].  $\square$

Next, we formally prove our Theorem 1. Our proof is inspired by previous work [10, 9]. Roughly speaking, the idea is to derive the label probability lower and upper bounds via computing the probability of random variables in certain regions crafted by the variant of Neyman-Pearson Lemma. However, due to the difference in sampling methods, our space divisions are significantly different from previous work [9]. Recall that we denote  $p_i = \Pr(f(\mathbf{W}) = i)$  and  $p_i^* = \Pr(f(\mathbf{Z}) = i)$ , where  $i \in \{1, 2, \dots, c\}$ . We denote  $y = \operatorname{argmax}_{i=\{1,2,\dots,c\}} p_i$ . Our goal is to find the maximum  $r^*$  such that  $y = \operatorname{argmax}_{i=\{1,2,\dots,c\}} p_i^*$ , i.e.,  $p_y^* > p_e^* = \max_{i \neq y} p_i^*$ , for  $\forall T^* \in \Gamma(T, r^*)$ . Our key step is to derive a lower bound of  $p_y^*$  and an upper bound of  $p_e^* = \max_{i \neq y} p_i^*$  via Lemma 1. Given these probability bounds, we can find the maximum  $r^*$  such that the lower bound of  $p_y^*$  is larger than the upper bound of  $p_e^*$ .

**Dividing the space  $\Phi$ :** We first divide the space  $\Phi$  into

three regions which are as follows:

$$\Delta_T = \{\varphi \in \Phi | \varphi \subseteq T, \varphi \not\subseteq E\}, \quad (14)$$

$$\Delta_{T^*} = \{\varphi \in \Phi | \varphi \subseteq T^*, \varphi \not\subseteq E\}, \quad (15)$$

$$\Delta_E = \{\varphi \in \Phi | \varphi \subseteq E\}, \quad (16)$$

where  $\Delta_E$  consists of the subsampled point clouds that can be obtained by subsampling  $k$  points from  $E$ ; and  $\Delta_T$  (or  $\Delta_{T^*}$ ) consists of the subsampled point clouds that are subsampled from  $T$  (or  $T^*$ ) but do not belong to  $\Delta_E$ . Since  $\mathbf{W}$  and  $\mathbf{Z}$ , respectively, represent the random 3D point clouds with  $k$  points subsampled from  $T$  and  $T^*$  uniformly at random without replacement, we have the following probability mass functions:

$$\Pr(\mathbf{W} = \varphi) = \begin{cases} \frac{1}{\binom{n}{k}}, & \text{if } \varphi \in \Delta_T \cup \Delta_E, \\ 0, & \text{otherwise,} \end{cases} \quad (17)$$

$$\Pr(\mathbf{Z} = \varphi) = \begin{cases} \frac{1}{\binom{t}{k}}, & \text{if } \varphi \in \Delta_{T^*} \cup \Delta_E, \\ 0, & \text{otherwise,} \end{cases} \quad (18)$$

where  $t$  is the number of points in  $T^*$  (i.e.,  $t = |T^*|$ ). We use  $s$  to denote the number of intersection points between  $T$  and  $T^*$ , i.e.,  $s = |E| = |T \cap T^*|$ . Then, the size of  $\Delta_E$  is  $\binom{s}{k}$ , i.e.,  $|\Delta_E| = \binom{s}{k}$ . Given the size of  $\Delta_E$ , we have the following probabilities:

$$\Pr(\mathbf{W} \in \Delta_E) = \frac{\binom{s}{k}}{\binom{n}{k}}, \quad (19)$$

$$\Pr(\mathbf{W} \in \Delta_T) = 1 - \frac{\binom{s}{k}}{\binom{n}{k}}, \quad (20)$$

$$\Pr(\mathbf{W} \in \Delta_{T^*}) = 0. \quad (21)$$

$$\Pr(\mathbf{Z} \in \Delta_E) = \frac{\binom{s}{k}}{\binom{t}{k}}, \quad (22)$$

$$\Pr(\mathbf{Z} \in \Delta_{T^*}) = 1 - \frac{\binom{s}{k}}{\binom{t}{k}}, \quad (23)$$

$$\Pr(\mathbf{Z} \in \Delta_T) = 0. \quad (24)$$

We have  $\Pr(\mathbf{W} \in \Delta_E) = \frac{\binom{s}{k}}{\binom{n}{k}}$  because  $\Pr(\mathbf{W} \in \Delta_E) = \frac{|\Delta_E|}{|\Delta_T \cup \Delta_E|} = \frac{\binom{s}{k}}{\binom{n}{k}}$ . Since  $\Pr(\mathbf{W} \in \Delta_T) + \Pr(\mathbf{W} \in \Delta_E) = 1$ , we have  $\Pr(\mathbf{W} \in \Delta_T) = 1 - \frac{\binom{s}{k}}{\binom{n}{k}}$ . We have  $\Pr(\mathbf{W} \in \Delta_{T^*}) = 0$  because  $\mathbf{W}$  is subsampled from  $T$ , which does not contain any points from  $T^* \setminus E$ . Similarly, we can compute the probabilities of random variable  $\mathbf{Z}$  in those regions.

Based on the fact that  $p_y$  and  $p_i (i \neq y)$  should be integer multiples of  $1/\binom{n}{k}$ , we derive the following bounds:

$$\underline{p}'_y \triangleq \frac{\lceil p_y \cdot \binom{n}{k} \rceil}{\binom{n}{k}} \leq \Pr(f(\mathbf{W}) = y), \quad (25)$$

$$\bar{p}'_i \triangleq \frac{\lfloor \bar{p}_i \cdot \binom{n}{k} \rfloor}{\binom{n}{k}} \geq \Pr(f(\mathbf{W}) = i), \forall i \neq y. \quad (26)$$

**Deriving a lower bound of  $p_y^*$ :** We define a binary function  $H_y(\varphi) = \mathbb{I}(f(\varphi) = y)$ , where  $\varphi \in \Phi$  and  $\mathbb{I}$  is an indicator function. Then, we have the following based on the definitions of the random variable  $\mathbf{Z}$  and the function  $H_y$ :

$$p_y^* = \Pr(f(\mathbf{Z}) = y) = \Pr(H_y(\mathbf{Z}) = 1). \quad (27)$$

Our idea is to find a region such that we can apply Lemma 1 to derive a lower bound of  $\Pr(H_y(\mathbf{Z}) = 1)$ . We assume  $\underline{p}'_y - \left(1 - \frac{\binom{s}{k}}{\binom{n}{k}}\right) \geq 0$ . We can make this assumption because we only need to find a sufficient condition. Then, we can find a region  $\Delta_y \subseteq \Delta_E$  satisfying the following:

$$\Pr(\mathbf{W} \in \Delta_y) \quad (28)$$

$$= \underline{p}'_y - \Pr(\mathbf{W} \in \Delta_T) \quad (29)$$

$$= \underline{p}'_y - \left(1 - \frac{\binom{s}{k}}{\binom{n}{k}}\right). \quad (30)$$

We can find the region  $\Delta_y$  because  $\underline{p}'_y$  is an integer multiple of  $\frac{1}{\binom{n}{k}}$ . Given the region  $\Delta_y$ , we define the following region:

$$\mathcal{A} = \Delta_T \cup \Delta_y. \quad (31)$$

Then, based on Equation (25), we have:

$$\Pr(f(\mathbf{W}) = y) \geq \underline{p}'_y = \Pr(\mathbf{W} \in \mathcal{A}). \quad (32)$$

We can establish the following based on the definition of  $\mathbf{W}$ :

$$\Pr(H_y(\mathbf{W}) = 1) = \Pr(f(\mathbf{W}) = y) \geq \Pr(\mathbf{W} \in \mathcal{A}). \quad (33)$$

Furthermore, we have  $\Pr(\mathbf{W} = \varphi) > \epsilon \cdot \Pr(\mathbf{Z} = \varphi)$  if and only if  $\varphi \in \Delta_T$  and  $\Pr(\mathbf{W} = \varphi) = \epsilon \cdot \Pr(\mathbf{Z} = \varphi)$  if  $\varphi \in \Delta_y$ , where  $\epsilon = \frac{\binom{t}{k}}{\binom{n}{k}}$ . Therefore, based on the definition of  $\mathcal{A}$  in Equation (31) and the condition in Equation (33), we obtain the following by applying Lemma 1:

$$\Pr(H_y(\mathbf{Z}) = 1) \geq \Pr(\mathbf{Z} \in \mathcal{A}). \quad (34)$$

Since we have  $p_y^* = \Pr(H_y(\mathbf{Z}) = 1)$ ,  $\Pr(\mathbf{Z} \in \mathcal{A})$  is a lower bound of  $p_y^*$  and can be computed as follows:

$$\Pr(\mathbf{Z} \in \mathcal{A}) \quad (35)$$

$$= \Pr(\mathbf{Z} \in \Delta_T) + \Pr(\mathbf{Z} \in \Delta_y) \quad (36)$$

$$= \Pr(\mathbf{Z} \in \Delta_y) \quad (37)$$

$$= \Pr(\mathbf{W} \in \Delta_y) / \epsilon \quad (38)$$

$$= \frac{1}{\epsilon} \cdot \left( \underline{p}'_y - \left(1 - \frac{\binom{s}{k}}{\binom{n}{k}}\right) \right). \quad (39)$$

We have Equation (37) from (36) because  $\Pr(\mathbf{Z} \in \Delta_T) = 0$ , Equation (38) from (37) as  $\Pr(\mathbf{W} = \varphi) = \epsilon \cdot \Pr(\mathbf{Z} = \varphi)$  for  $\varphi \in \Delta_y$ , and the last Equation from Equation (28) - (30).

**Deriving an upper bound of  $\max_{i \neq y} p_i^*$ :** We leverage the second part of Lemma 1 to derive an upper bound of  $\max_{i \neq y} p_i^*$ . We assume  $\Pr(\mathbf{W} \in \Delta_E) > \bar{p}'_i, \forall i \in \{1, 2, \dots, c\} \setminus \{y\}$ . We can make the assumption because we aim to derive a sufficient condition. For  $\forall i \in \{1, 2, \dots, c\} \setminus \{y\}$ , we can find a region  $\Delta_i \subseteq \Delta_E$  such that we have the following:

$$\Pr(\mathbf{W} \in \Delta_i) = \bar{p}'_i. \quad (40)$$

We can find the region because  $\bar{p}'_i$  is an integer multiple of  $\frac{1}{\binom{n}{k}}$ . Given region  $\Delta_i$ , we define the following region:

$$\mathcal{B}_i = \Delta_i \cup \Delta_{T^*}. \quad (41)$$

For  $\forall i \in \{1, 2, \dots, c\} \setminus \{y\}$ , we define a function  $H_i(\varphi) = \mathbb{I}(f(\varphi) = i)$ , where  $\varphi \in \Phi$ . Then, based on Equation (26) and the definition of random variable  $\mathbf{W}$ , we have:

$$\Pr(H_i(\mathbf{W}) = 1) = \Pr(f(\mathbf{W}) = i) \leq \bar{p}'_i = \Pr(\mathbf{W} \in \mathcal{B}_i). \quad (42)$$

We note that  $\Pr(\mathbf{W} = \varphi) < \epsilon \cdot \Pr(\mathbf{Z} = \varphi)$  if and only if  $\varphi \in \Delta_{T^*}$  and  $\Pr(\mathbf{W} = \varphi) = \epsilon \cdot \Pr(\mathbf{Z} = \varphi)$  if  $\varphi \in \Delta_i$ , where  $\epsilon = \frac{\binom{t}{k}}{\binom{n}{k}}$ . Based on the definition of random variable  $\mathbf{Z}$ , Equation (42), and Lemma 1, we have the following:

$$\Pr(H_i(\mathbf{Z}) = 1) \leq \Pr(\mathbf{Z} \in \mathcal{B}_i). \quad (43)$$

Since we have  $p_i^* = \Pr(f(\mathbf{Z}) = i) = \Pr(H_i(\mathbf{Z}) = 1)$ ,  $\Pr(\mathbf{Z} \in \mathcal{B}_i)$  is an upper bound of  $p_i^*$  and can be computed as follows:

$$\Pr(\mathbf{Z} \in \mathcal{B}_i) \quad (44)$$

$$= \Pr(\mathbf{Z} \in \Delta_i) + \Pr(\mathbf{Z} \in \Delta_{T^*}) \quad (45)$$

$$= \Pr(\mathbf{Z} \in \Delta_i) + 1 - \frac{\binom{s}{k}}{\binom{t}{k}} \quad (46)$$

$$= \Pr(\mathbf{W} \in \Delta_i) / \epsilon + 1 - \frac{\binom{s}{k}}{\binom{t}{k}} \quad (47)$$

$$= \frac{1}{\epsilon} \cdot \bar{p}'_i + 1 - \frac{\binom{s}{k}}{\binom{t}{k}}. \quad (48)$$

By considering all possible  $i$  in the set  $\{1, 2, \dots, c\} \setminus \{y\}$ , we have:

$$\max_{i \neq y} p_i^* \quad (49)$$

$$\leq \max_{i \neq y} \Pr(\mathbf{Z} \in \mathcal{B}_i) \quad (50)$$

$$= \frac{1}{\epsilon} \cdot \max_{i \neq y} \bar{p}'_i + 1 - \frac{\binom{s}{k}}{\binom{t}{k}} \quad (51)$$

$$\leq \frac{1}{\epsilon} \cdot \bar{p}'_e + 1 - \frac{\binom{s}{k}}{\binom{t}{k}}, \quad (52)$$

where  $\bar{p}'_e \geq \max_{i \neq y} \bar{p}'_i$ .

**Deriving the certified perturbation size:** To reach our goal  $\Pr(f(\mathbf{Z}) = y) > \max_{i \neq y} \Pr(f(\mathbf{Z}) = i)$ , it is sufficient to have the following:

$$\frac{1}{\epsilon} \cdot \left( \underline{p}'_y - \left( 1 - \frac{\binom{s}{k}}{\binom{n}{k}} \right) \right) > \frac{1}{\epsilon} \cdot \bar{p}'_e + 1 - \frac{\binom{s}{k}}{\binom{n}{k}} \quad (53)$$

$$\iff \frac{\binom{t}{k}}{\binom{n}{k}} - 2 \cdot \frac{\binom{s}{k}}{\binom{n}{k}} + 1 - \underline{p}'_y + \bar{p}'_e < 0. \quad (54)$$

Since Equation (54) should be satisfied for all possible perturbed point cloud  $T^*$  (i.e.,  $n - r \leq t \leq n + r$ ), we have the following sufficient condition:

$$\max_{n-r \leq t \leq n+r} \frac{\binom{t}{k}}{\binom{n}{k}} - 2 \cdot \frac{\binom{s}{k}}{\binom{n}{k}} + 1 - \underline{p}'_y + \bar{p}'_e < 0. \quad (55)$$

When the above Equation (55) is satisfied, we have  $\underline{p}'_y - \left( 1 - \frac{\binom{s}{k}}{\binom{n}{k}} \right) \geq 0$  and  $\Pr(\mathbf{W} \in \Delta_E) = \frac{\binom{s}{k}}{\binom{n}{k}} \geq \bar{p}'_e, \forall i \in \{1, 2, \dots, c\} \setminus \{y\}$ , which are the conditions that we rely on to construct the region  $\Delta_y$  and  $\Delta_i (i \neq y)$ . The certified perturbation size  $r^*$  is the maximum  $r$  that satisfies the above sufficient condition. Note that  $s = \max(n, t) - r$ . Then, our certified perturbation size  $r^*$  can be derived by solving the following optimization problem:

$$\begin{aligned} r^* &= \operatorname{argmax}_r \\ \text{s.t. } \max_{n-r \leq t \leq n+r} & \frac{\binom{t}{k}}{\binom{n}{k}} - 2 \cdot \frac{\binom{\max(n, t) - r}{k}}{\binom{n}{k}} + 1 - \underline{p}'_y + \bar{p}'_e < 0. \end{aligned} \quad (56)$$

## B. Proof of Theorem 2

Similar to previous work [4, 10, 9], we show the tightness of our bounds via constructing a counterexample. In particular, when  $r > r^*$ , we will show that we can construct a point cloud  $T^*$  and a point cloud classifier  $f^*$  which satisfies the Equation (4) such that the label  $y$  is not predicted by our PointGuard or there exist ties. Since  $r^*$  is the maximum value that satisfies the Equation (56), there exists a point cloud  $T^*$  satisfying the following when  $r > r^*$ :

$$\frac{\binom{t}{k}}{\binom{n}{k}} - 2 \cdot \frac{\binom{\max(n, t) - r}{k}}{\binom{n}{k}} + 1 - \underline{p}'_y + \bar{p}'_e \geq 0 \quad (57)$$

$$\iff \frac{\binom{t}{k}}{\binom{n}{k}} - \frac{\binom{\max(n, t) - r}{k}}{\binom{n}{k}} + \bar{p}'_e \geq \underline{p}'_y - \left( 1 - \frac{\binom{\max(n, t) - r}{k}}{\binom{n}{k}} \right) \quad (58)$$

$$\iff \frac{\bar{p}'_e}{\epsilon} + 1 - \frac{\binom{\max(n, t) - r}{k}}{\binom{n}{k}} \geq \frac{1}{\epsilon} \cdot \left( \underline{p}'_y - \left( 1 - \frac{\binom{\max(n, t) - r}{k}}{\binom{n}{k}} \right) \right) \quad (59)$$

where  $t$  is the number of points in  $T^*$  and  $\epsilon = \frac{\binom{t}{k}}{\binom{n}{k}}$ . Let  $\Delta_e \subseteq \Delta_E$  be the region that satisfies the following:

$$\Delta_e \cap \Delta_y = \emptyset \text{ and } \Pr(\mathbf{W} \in \Delta_e) = \bar{p}'_e. \quad (60)$$

Note that we can find the region  $\Delta_e$  because we have  $\underline{p}'_y + \bar{p}'_e \leq 1$ . We let  $\mathcal{B}_e = \Delta_{T^*} \cup \Delta_e$ . Then, we can divide the the region  $\Phi \setminus (\mathcal{A} \cap \mathcal{B}_e)$  into  $c - 2$  regions and we use  $\mathcal{B}_i$  to denote each region, where  $i \in \{1, 2, \dots, c\} \setminus \{y, e\}$ . In particular, each region  $\mathcal{B}_i$  satisfies  $\Pr(T \in \mathcal{B}_i) \leq \bar{p}'_i$ . We can find these regions since  $\underline{p}'_y + \sum_{i \neq y} \bar{p}'_i \geq 1$ . Then, we can construct the following point cloud classifier  $f^*$ :

$$f^*(\varphi) = \begin{cases} y, & \text{if } \varphi \in \mathcal{A}, \\ i, & \text{if } \varphi \in \mathcal{B}_i. \end{cases} \quad (61)$$

Note that the point cloud classifier  $f^*$  is well-defined in the space  $\Phi$ . We have the following probabilities for our constructed point cloud classifier  $f^*$ :

$$\Pr(f^*(\mathbf{W}) = y) = \Pr(\mathbf{W} \in \mathcal{A}) = \underline{p}'_y, \quad (62)$$

$$\Pr(f^*(\mathbf{W}) = e) = \Pr(\mathbf{W} \in \mathcal{B}_e) = \bar{p}'_e, \quad (63)$$

$$\Pr(f^*(\mathbf{W}) = i) = \Pr(\mathbf{W} \in \mathcal{B}_i) \leq \bar{p}'_i, \quad (64)$$

where  $i \in \{1, 2, \dots, c\} \setminus \{y, e\}$ . Note that the point cloud classifier  $f^*$  is consistent with Equation (4). Moreover, we have the following:

$$\Pr(f^*(\mathbf{Z}) = e) \quad (65)$$

$$= \Pr(\mathbf{Z} \in \mathcal{B}_e) \quad (66)$$

$$= \frac{\bar{p}'_e}{\epsilon} + 1 - \frac{\binom{\max(n, t) - r}{k}}{\binom{n}{k}} \quad (67)$$

$$\geq \frac{1}{\epsilon} \cdot \left( \underline{p}'_y - \left( 1 - \frac{\binom{\max(n, t) - r}{k}}{\binom{n}{k}} \right) \right) \quad (68)$$

$$= \Pr(\mathbf{Z} \in \mathcal{A}) \quad (69)$$

$$= \Pr(f^*(\mathbf{Z}) = y), \quad (70)$$

where  $\epsilon = \frac{\binom{t}{k}}{\binom{n}{k}}$ . Note that we derive Equation (68) from (67) based on Equation (59). Therefore, for  $\forall r > r^*$ , there exist a point cloud classifier  $f^*$  which satisfies Equation (4) and a point cloud  $T^*$  such that  $g(T^*) \neq y$  or there exist ties.

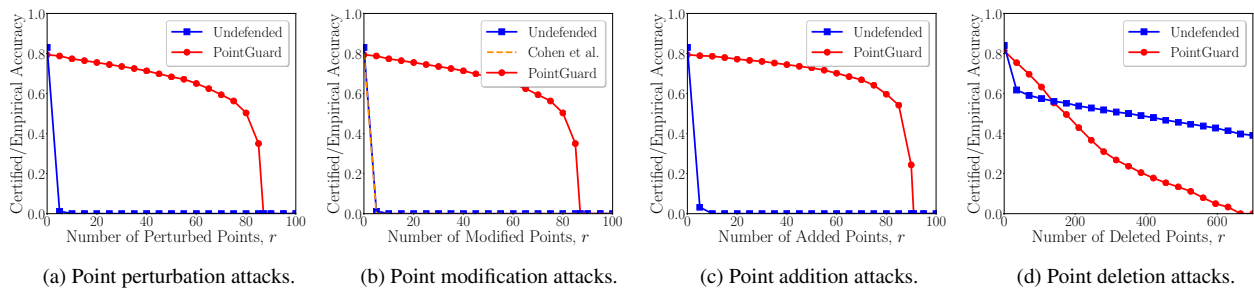

**Figure 5: Comparing different methods under different attacks on ScanNet.**

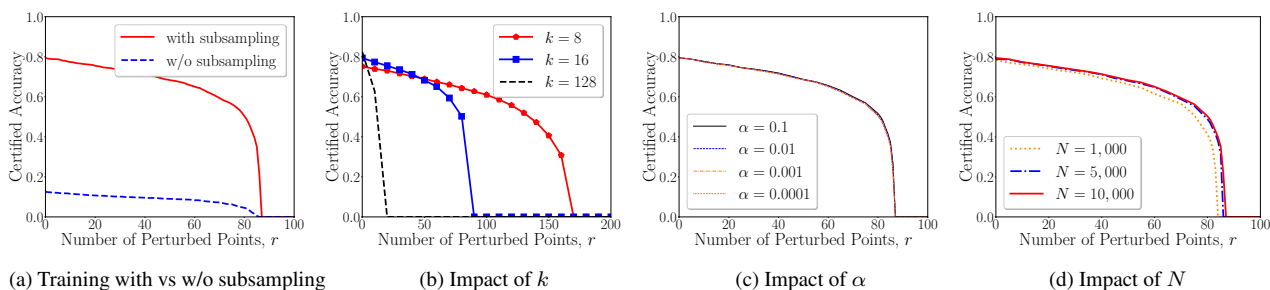

**Figure 6: (a) Training the point cloud classifier with vs. without subsampling. (b), (c), and (d) show the impact of  $k$ ,  $\alpha$ , and  $N$ , respectively. The dataset is ScanNet.**
